# Supplementary material
Source: PubMed Central journal article supplement (PMC4303298)

Supplemental Table 1. MICs of CTX-M-14  $\beta$ -lactamase and mutant enzymes.

| $\beta$ -lactamase   | benzylpenicillin<br>( $\mu\text{g/mL}$ ) | cephalothin<br>( $\mu\text{g/mL}$ ) | cefotaxime<br>( $\mu\text{g/mL}$ ) |
|----------------------|------------------------------------------|-------------------------------------|------------------------------------|
| CTX-M-14 (wt*)       | >256                                     | >256                                | 12                                 |
| S237A                | >256                                     | >256                                | 0.38                               |
| R276A                | >256                                     | >256                                | 2                                  |
| R276N                | >256                                     | >256                                | 1.5                                |
| S237A:R276A          | >256                                     | >256                                | 0.5                                |
| S237A:R276N          | >256                                     | 24                                  | 0.125                              |
| <i>E. coli</i> RB791 | 16                                       | 12                                  | 0.064                              |

\*CTX-M-14 and mutants used in this study are on the pTP123 vector

## SUPPLEMENTAL FIGURE LEGENDS

**Supp. Figure 1. Catalytic efficiency of CTX-M-14  $\beta$ -lactamase and mutant enzymes.** The catalytic efficiency ( $k_{cat}/K_m$ ) of the enzyme is plotted on the y-axis and the CTX-M-14 variants are plotted on the x-axis. The catalytic efficiency is shown for three different substrates moving from left to right: benzylpenicillin, cephalothin and cefotaxime. Significant changes between CTX-M-14 and the variants are denoted as '\*\*' (p-value<0.005) and '\*\*\*' (p-value<0.0005) as determined by an unpaired T-test.

**Supp. Figure 2. Fluorescence scan of CTX-M-14  $\beta$ -lactamase and mutant enzymes.** Normalized intensity is plotted on the y-axis and wavelength (nm) is plotted on the x-axis. The fluorescence scan for CTX-M-14 (WT) is shown as red dots, the S237A variant is shown as blue triangles and S237A:R276A variant is shown as boxes. All proteins tested exhibited maximum intensity between 333 nm and 335 nm.

Supplemental Figure 1.

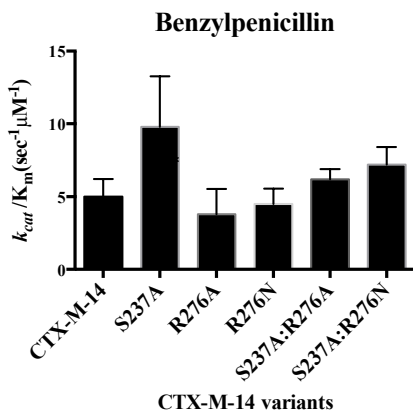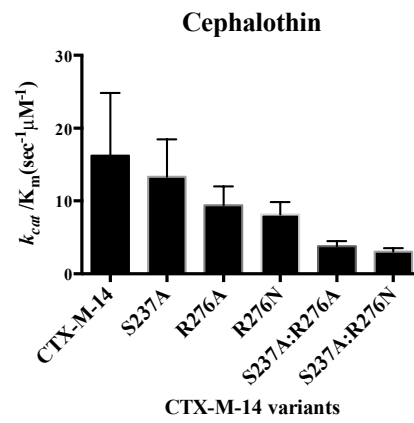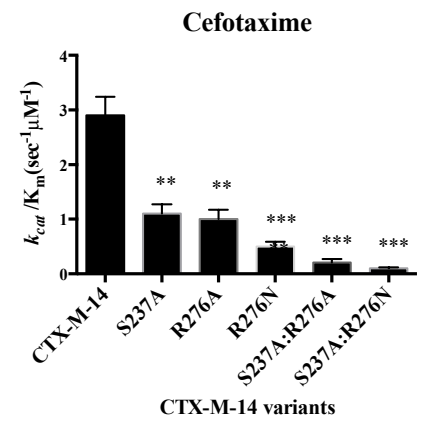

Supplemental Figure 2.

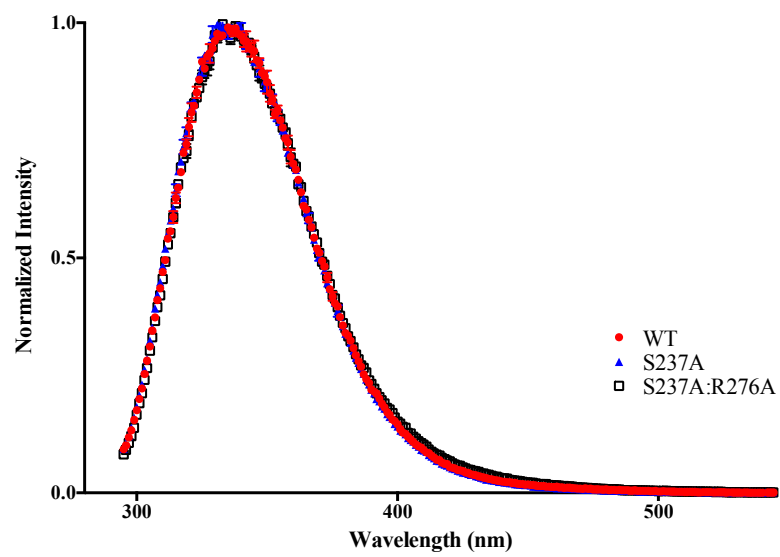

Supplement: bi501195g_si_001.pdf [file bi501195g_si_001.pdf]
